# Supplementary material for: Enhancement of 5-aminolevulinic acid-based fluorescence detection of side population-defined glioma stem cells by iron chelation
Source: PubMed Central journal article supplement (PMC5294410; doi:10.1038/srep42070), 2017-02-07
Supplement: srep42070-s1.pdf [file srep42070-s1.pdf]

## **Supplementary Information**

Enhancement of 5-aminolevulinic acid-based fluorescence detection of side population-defined glioma stem cells by iron chelation

Wenqian Wang<sup>1</sup>, Kouichi Tabu<sup>1§</sup>, Yuichiro Hagiya<sup>2</sup>, Yuta Sugiyama<sup>2</sup>,  
Yasuhiro Kokubu<sup>1</sup>, Yoshitaka Murota<sup>1</sup>, Shun-ichiro Ogura<sup>2</sup>, Tetsuya Taga<sup>1§</sup>

<sup>1</sup>Department of Stem Cell Regulation, Medical Research Institute, Tokyo Medical and Dental University (TMDU), Bunkyo-ku, Tokyo, 1138510, Japan

<sup>2</sup>Graduate School of Bioscience and Biotechnology, Tokyo Institute of Technology, 4259-B102, Nagatsuta-cho, Midori-ku, Yokohama, 2268501, Japan

**Supplementary Figures S1-S7**

**Supplementary Table S1**

**Supplementary Methods**

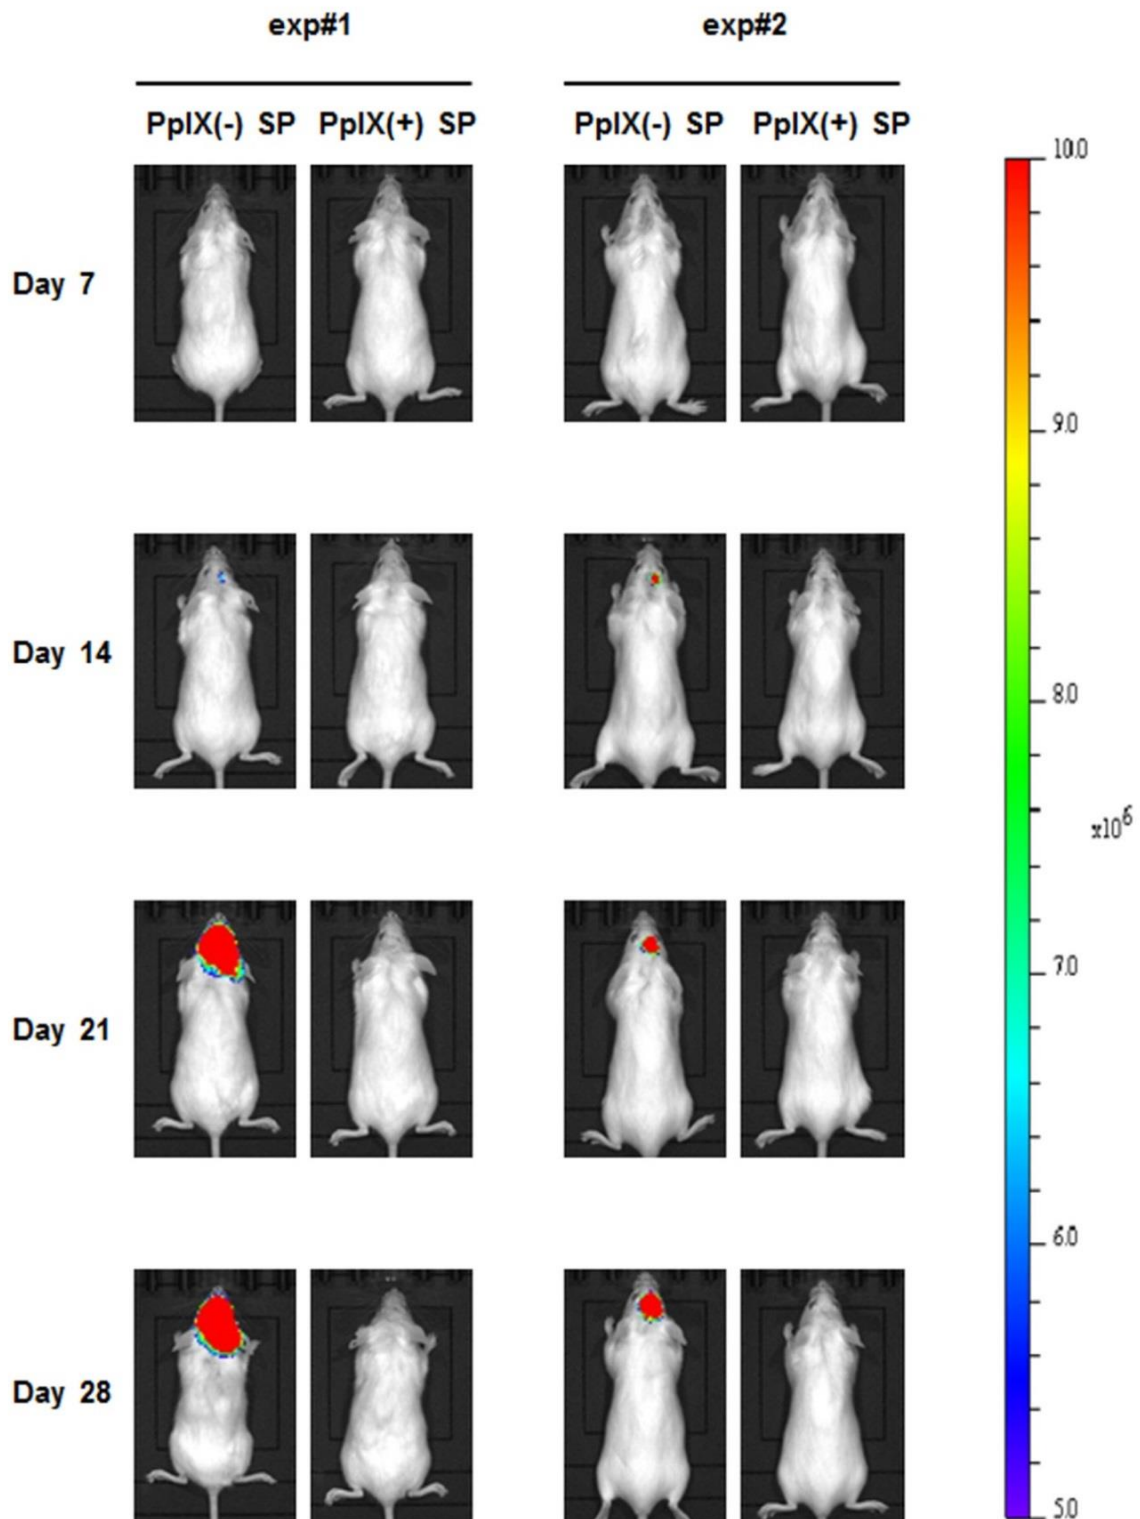

**Supplementary Figure S1. C6 SP-derived PpIX fluorescence low cells have higher tumorigenicity (related to Figure 3)**

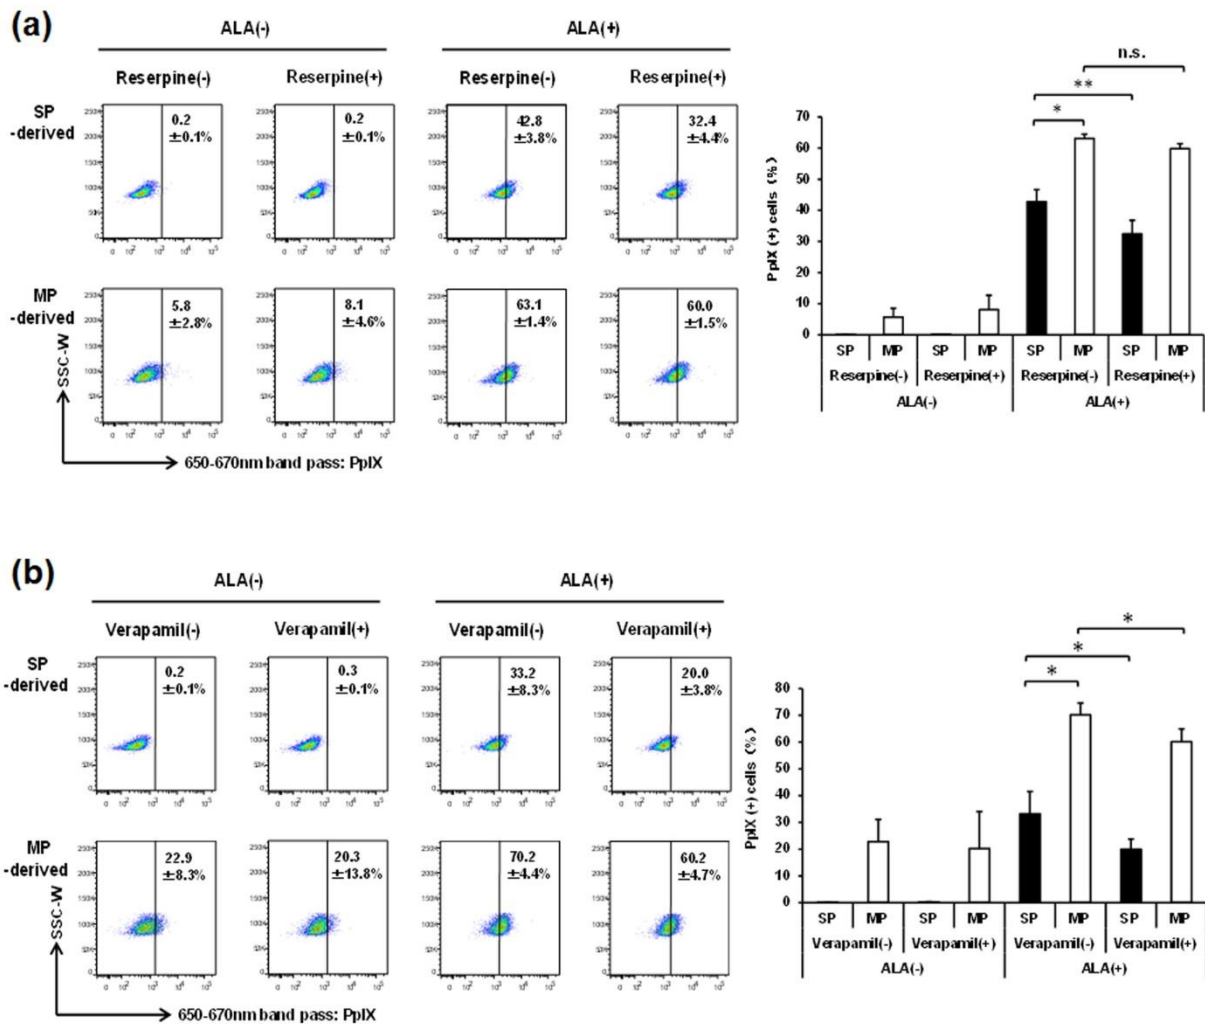

### Supplementary Figure S2. Reserpine and verapamil, inhibitors of ABC transporters, have no effects on low accumulation of PpIX in SP-derived cells

Intracellular PpIX accumulation in C6 SP- and MP-derived cells treated with or without 5-ALA in the presence or absence of reserpine (a) or verapamil (b). The percentages of PpIX(+) cells are indicated in representative FACS plots (left) and presented in a bar graph (right) as means $\pm$ SD from three independent experiments. \*\* $P < 0.01$ . \* $P < 0.05$ . n.s., not significant.

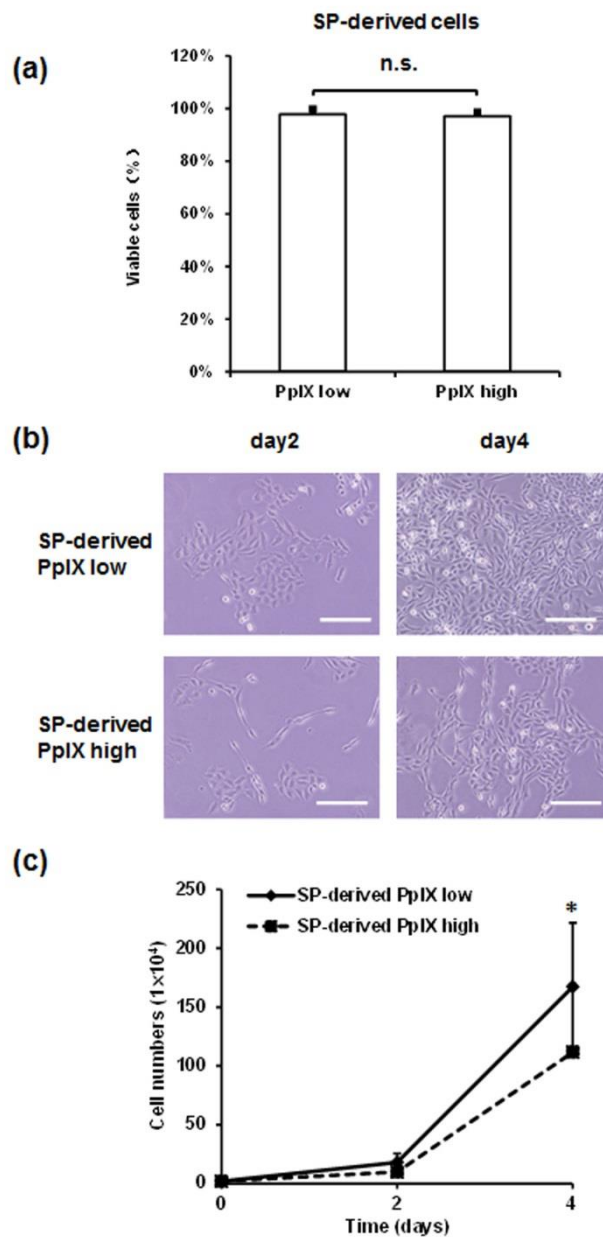

### Supplementary Figure S3. Cell viability and growth of SP-derived PpIX fluorescence low and high cells in vitro

(a) The percentages of viable cells in PpIX fluorescence low and high fractions are presented in a bar graph as means $\pm$ SD from three independent experiments. n.s., not significant. (b) Representative images of SP-derived PpIX fluorescence low and high cells are shown on day 2 and 4 after reculturing. Scale bars, 200  $\mu$ m. (c) The growth curves of SP-derived PpIX fluorescence low and high cells. Data were presented as means $\pm$ SD from three independent experiments. \* $P$ <0.05.

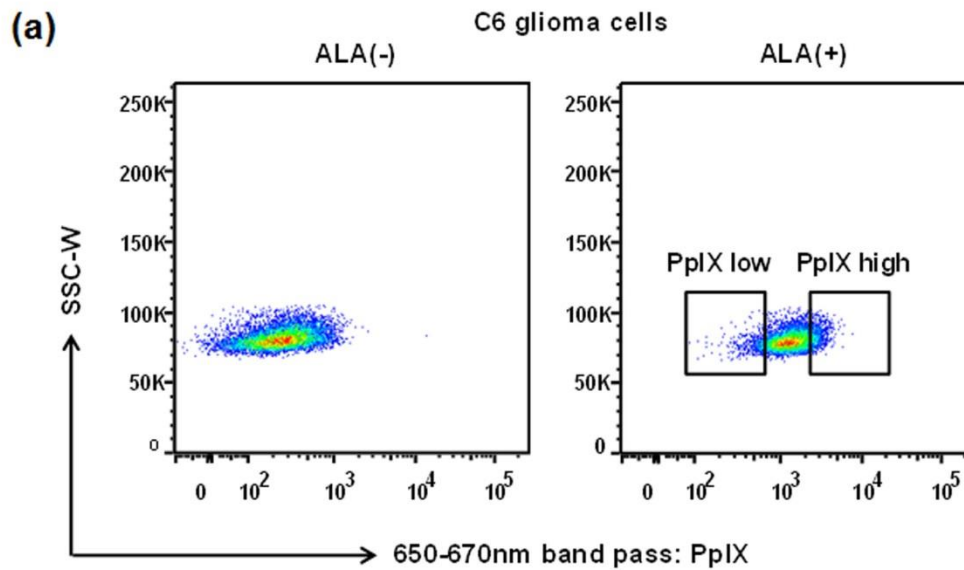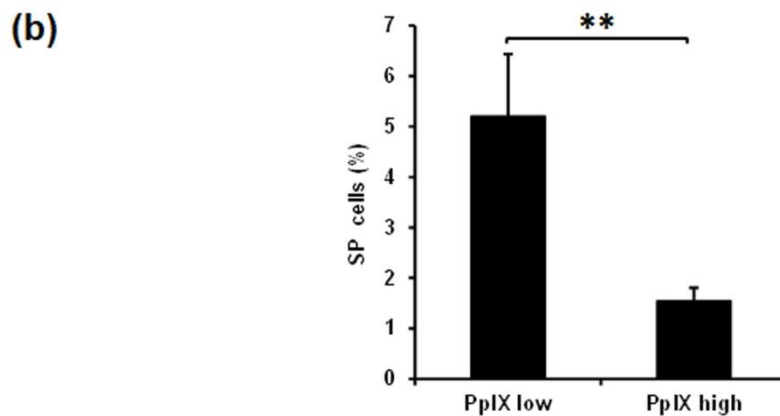

### Supplementary Figure S4. C6 glioma PpIX fluorescence low cells contain higher percentage of SP cells

(a) FACS plots of PpIX fluorescence low and high cells in C6 glioma cells treated with 5-ALA. (b) The percentages of SP cells in PpIX fluorescence low and high fractions are presented in a bar graph as means $\pm$ SD from five independent experiments. \*\* $P < 0.01$ .

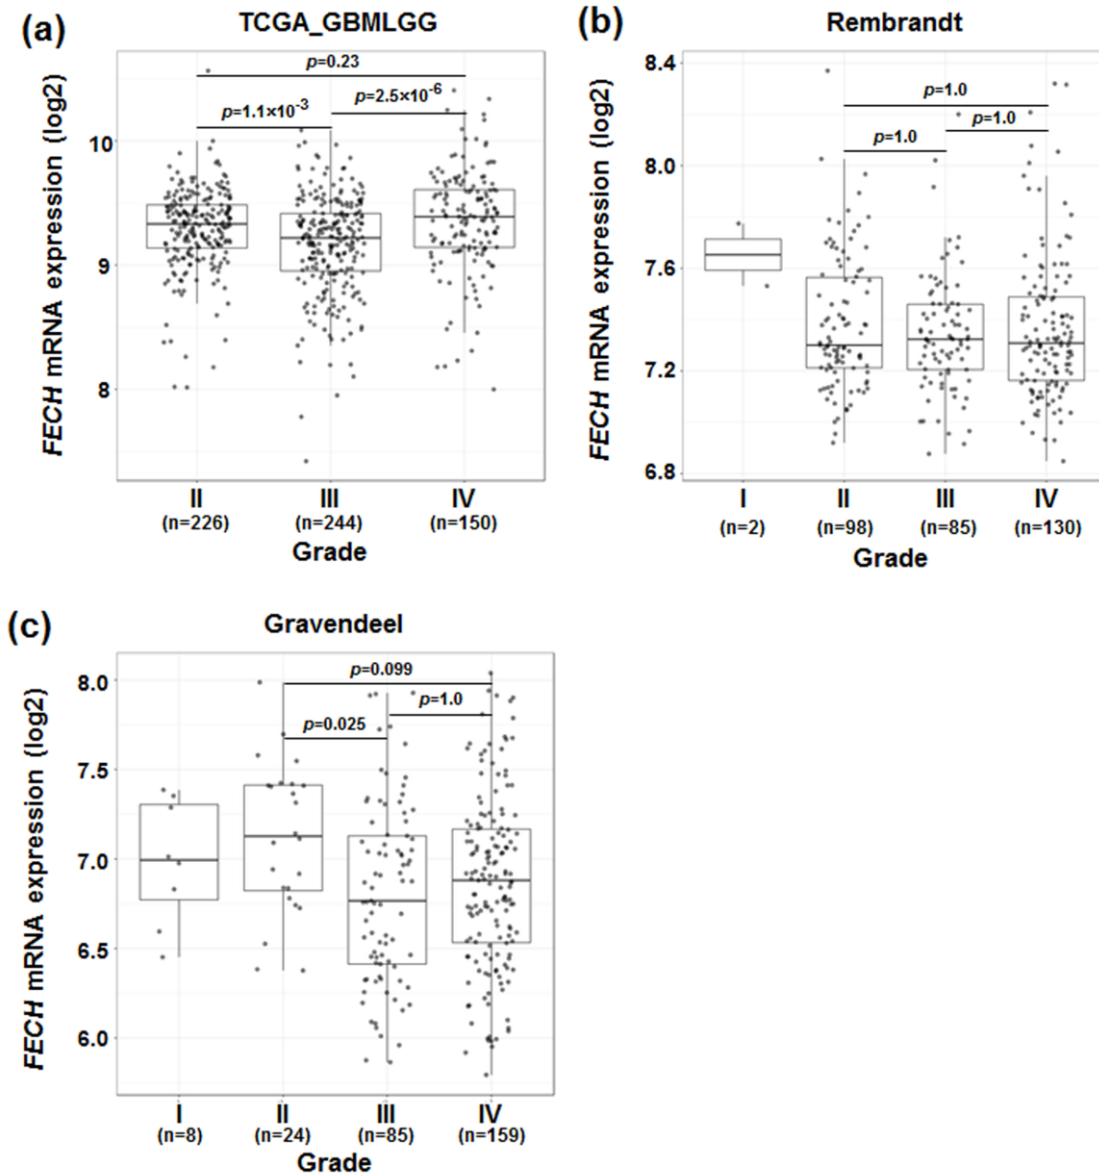

**Supplementary Figure S5. *FECH* expression between different grades of human gliomas**

Box plots for *FECH* mRNA expression in different grades of gliomas from TCGA\_GBMLGG (a), Rembrandt (b) and Gravendeel (c) datasets are presented. Data were statistically analyzed by pairwise *t*-tests.

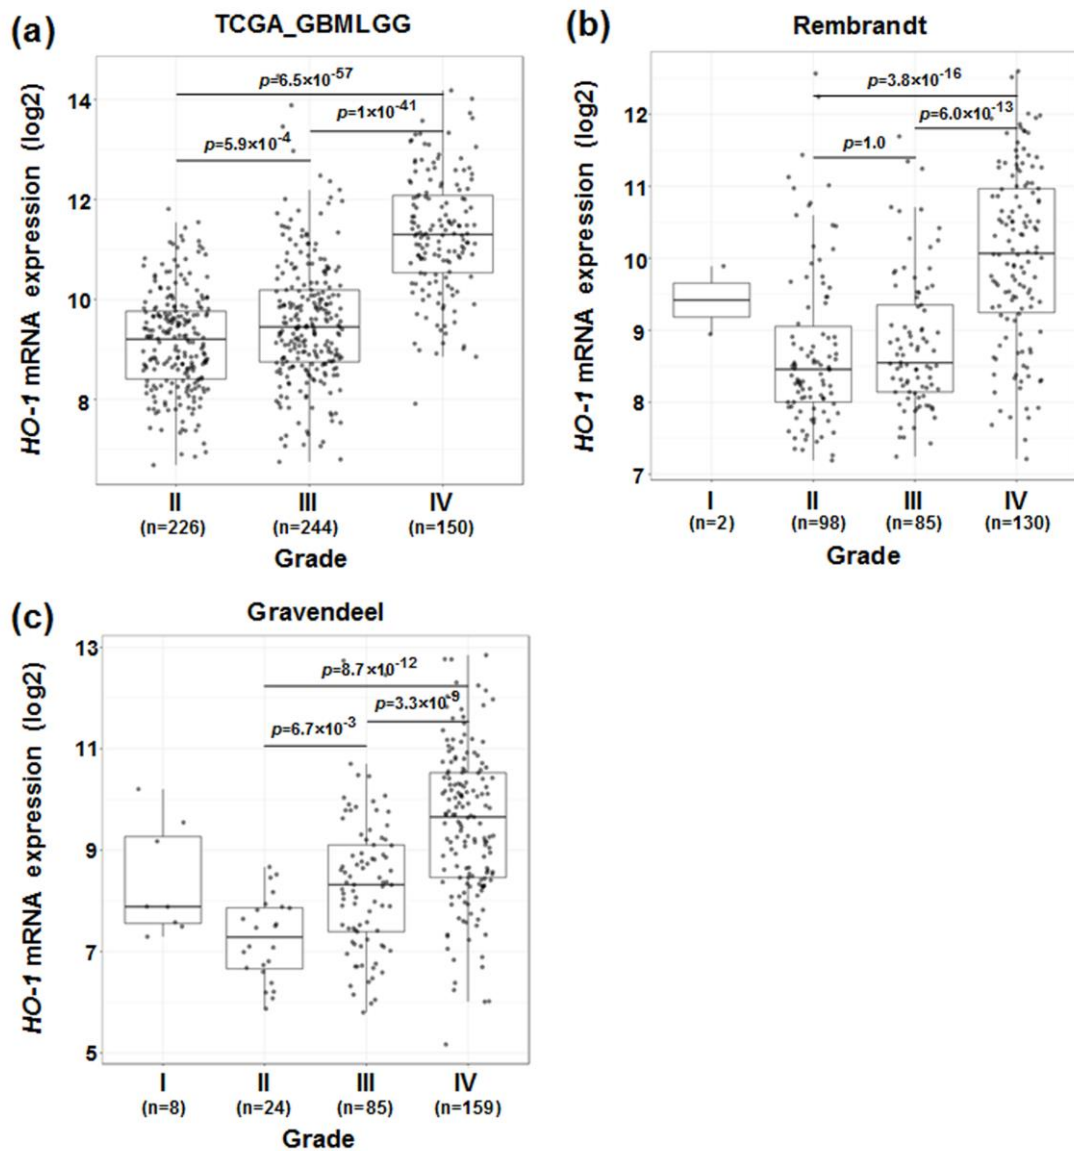

**Supplementary Figure S6. *HO-1* expression is higher in WHO grade IV GBMs than in lower grades of gliomas**

Box plots for *HO-1* (*HMOX1* in the dataset) mRNA expression in different grades of gliomas from TCGA\_GBMLGG (a), Rembrandt (b) and Gravendeel (c) datasets are presented. Data were statistically analyzed by pairwise *t*-tests.

Grade II/III

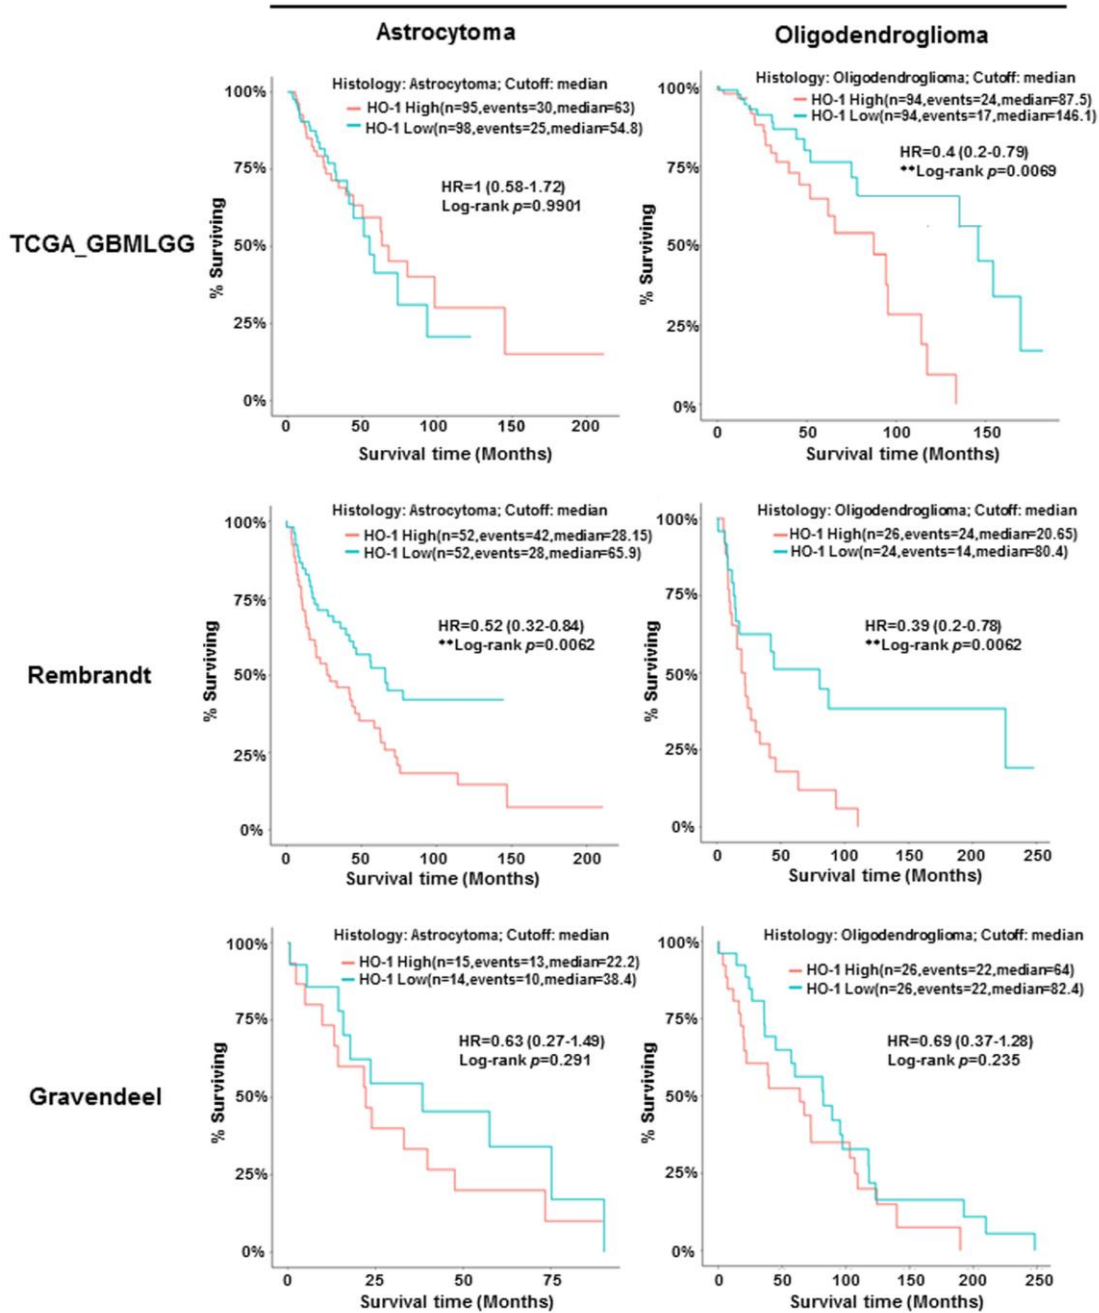

**Supplementary Figure S7. Elevated *HO-1* gene expression is correlated with poorer survival in lower grade glioma patients**

Kaplan-Meier survival analysis for human glioma Grade II/III (astrocytoma and oligodendroglioma) patients with higher and lower *HO-1* expression levels from TCGA\_GBMLGG, Rembrandt and Gravendeel datasets. Higher and lower expression groups are divided by the median expression value under statistical analysis with the log-rank test.



**Supplementary Table S1. Expression of 5-ALA metabolism enzyme genes in SP and MP cells**

| Gene Symbol  | GenBank ID   | Gene Name                                                  | SP     | MP     | Ratio (SP/MP) |
|--------------|--------------|------------------------------------------------------------|--------|--------|---------------|
| Hmox1 (Ho-1) | NM_012580    | heme oxygenase (decycling) 1                               | 52.363 | 18.989 | 2.757         |
| Alad         | NM_012899    | aminolevulinic acid dehydratase                            | 33.470 | 43.883 | 0.763         |
| Hmbs         | NM_013168    | hydroxymethylbilan synthase (protoporphyrinogen deaminase) | 4.219  | 4.140  | 1.019         |
| Uros         | NM_001012068 | uroporphyrinogen III synthase                              | 0.174  | 0.185  | 0.944         |
| Urod         | NM_019209    | uroporphyrinogen decarboxylase                             | 20.168 | 20.571 | 0.894         |
| Cpox         | NM_001037095 | coproporphyrinogen oxidase                                 | 0.706  | 0.747  | 0.946         |
| Ppox         | NM_001105968 | protoporphyrinogen oxidase                                 | 0.687  | 0.761  | 0.902         |
| Fech         | NM_001108434 | ferrochelatase                                             | 0.982  | 0.938  | 1.046         |
| Blvra        | NM_053850    | biliverdin reductase A                                     | 0.987  | 0.860  | 1.147         |
| Blvrb        | NM_001106236 | biliverdin reductase B (flavin reductase)                  | 16.831 | 21.491 | 0.783         |
| Ugt1a2       | NM_201423    | UDP-glucuronosyl transferase 1 family, polypeptide A2      | 0.783  | 0.738  | 1.061         |
| Ugt1a6       | NM_057105    | UDP-glucuronosyl transferase 1 family, polypeptide A6      | 0.103  | 0.096  | 1.066         |
| Alas1        | NM_024484    | aminolevulinic acid, delta-, synthase 1                    | 26.466 | 16.984 | 1.558         |
| Alas2        | NM_013197    | aminolevulinic acid, delta-, synthase 2                    | 0.027  | 0.025  | 1.084         |

## **Supplementary Methods**

### **Reagents**

ABC transporter inhibitors reserpine and verapamil were purchased from Sigma (St Louis, MO, USA).

### **FACS analysis of PpIX with inhibitors of ABC transporters**

The fluorescence intensity of cellular PpIX was determined by FACS. After SP and MP cells were sorted and re-cultured for 2 days, media were changed to fresh media containing 1 mM 5-ALA, and cells were additionally incubated for 4 hours. In some cases, 10  $\mu$ M reserpine or 50  $\mu$ M verapamil was added into media together with 5-ALA. PpIX fluorescence was measured with a FACS Aria II (BD Biosciences) using 488 nm laser and a 660/20 nm band-pass filter.

### **Cell viability assay**

PpIX fluorescence low and high cells were sorted from cultured SP cells by FACS and collected by centrifugation. The cell suspension was prepared by a 1:1 dilution using a 0.4% Trypan blue solution and examined immediately under a microscope. The numbers of blue staining cells and total cells were counted.

### **Bioinformatic analysis**

Gene expressions in different grades of gliomas and their correlation with

patients' clinical outcome were analyzed in TCGA\_GBMLGG, Rembrandt and Gravendeel datasets by using GlioVis (<http://gliovis.bioinfo.cnio.es/>).

### **Statistical analysis**

All comparisons between experimental groups, except for bioinformatics analysis, were made by Student's *t*-test. Target gene expression in different grade tumors was tested by pairwise *t* tests with corrections for multiple testing (*p* values with Bonferroni correction). For Kaplan-Meier survival curves, *p* values were obtained by using the log-rank test.
